# 1 **CHRONO participates in multi-modal repression of circadian transcriptional** 2 **complexes**

3  
4 *Priya Crosby<sup>1</sup>, Nicolette F. Goularte<sup>1#</sup>, Diksha Sharma<sup>1</sup>, Eefei Chen<sup>1</sup>, Gian Carlo G. Parico<sup>1</sup>, Jon M.*  
5 *Philpott<sup>1</sup>, Rachel Harold<sup>1</sup>, Chelsea L. Gustafson<sup>1,‡</sup>, Carrie L. Partch<sup>1,2\*</sup>*

6 <sup>1</sup>Department of Chemistry and Biochemistry, University of California Santa Cruz, Santa Cruz, California

7 <sup>2</sup>Center for Circadian Biology, University of California San Diego, La Jolla, California

8 <sup>‡</sup>Current address: South Puget Sound Community College, Olympia, Washington

9 <sup>#</sup>Current address: Stanford School of Medicine, Stanford, California

10 <sup>\*</sup>Correspondence to [cpartch@ucsc.edu](mailto:cpartch@ucsc.edu)

11

## 12 **Abstract**

13 The mammalian protein CHRONO was previously identified to be a rhythmically expressed repressor of  
14 the circadian transcriptional activator complex CLOCK:BMAL1. Mice and cells lacking CHRONO  
15 display a lengthened circadian period and altered circadian gene expression. Currently, however, we  
16 lack specific mechanistic understanding of CHRONO's activity and function. Here we define an  
17 evolutionarily conserved minimal repressive domain (MRD) of CHRONO and demonstrate this  
18 domain's capacity to repress CLOCK:BMAL1 activity through interaction with the BMAL1 C-terminal  
19 transactivation domain (TAD). Notably, this binding region overlaps with the binding site for CRY and  
20 coactivators CBP/p300, with CHRONO capable of competing with both of these classical regulators of  
21 BMAL1 for TAD binding, highlighting this as a hotspot for BMAL1 regulation.

22 Additionally, we investigate the previously unexplored interaction between CHRONO and  
23 another major circadian repressor, PER2. We show that CHRONO reduces PER2 stability through  
24 interaction between the CHRONO C-terminus and the Casein Kinase 1 (CK1)-binding domain of PER2.  
25 This results in competition between CHRONO and CK1 for binding at this site on PER2, adding another

1 layer to our understanding of PERIOD protein regulation. Taken together, these data show a more  
2 substantive role for CHRONO within molecular circadian timekeeping than previously posited and  
3 provide a platform for further investigation into CHRONO's role within the circadian repressive complex.  
4

## 5 **Introduction**

6 Circadian (~24hr) rhythms allow organisms to synchronise their physiology and behaviour with,  
7 and so anticipate, the external day-night cycle. These cell autonomous rhythms regulate a wide range  
8 of factors, including sleep/wake cycles, body temperature, metabolism, and hormone levels (Hastings  
9 et al., 2003, Reddy and O'Neill, 2010). It has been reported that up to 43% of all protein coding genes  
10 are transcribed in a circadian manner in at least one tissue (Zhang et al., 2014). Furthermore,  
11 disruption of circadian rhythmicity, as occurs during shift-work and jetlag, is associated with an  
12 increased prevalence of a number of disorders, including cardiovascular disease, type II diabetes,  
13 some forms of cancer, and compromised immune function (Salgado-Delgado et al., 2013, Scheer et al.,  
14 2009, Cuesta et al., 2016). Conversely, disrupted circadian rhythmicity in behaviour is one of the earlier  
15 symptoms of a number of neurodegenerative disorders, including Alzheimer's and Parkinson's disease  
16 (Li et al., 2017, Saeed and Abbott, 2017). Thus, mechanisms regulating circadian rhythmicity play a  
17 significant role in the maintenance of long-term human health.

18 At the molecular level, the canonical mammalian circadian oscillator consists of a  
19 transcription/translation feedback loop, or TTFL. Here, the transcriptional activators CLOCK and  
20 BMAL1, which are both basic-helix-loop-helix PER-ARNT-SIM (PAS) domain proteins, form a  
21 heterodimeric complex and bind to E-boxes, a DNA response element. This drives expression of a  
22 large number of downstream genes, including the transcriptional repressors PERIOD (of which there  
23 are three in mammals, PER1/2/3) and CRYPTOCHROME (of which there are two, CRY1/2). PER and  
24 CRY dimerise, recruit Casein Kinase 1 $\delta$  (CK1 $\delta$ ), and translocate to the nucleus, where they form a  
25 macromolecular complex with CLOCK:BMAL1 (Aryal et al., 2017), inhibiting their own transcriptional  
26 activity through formation of an 'early' repressive complex that involves CK1 $\delta$ -dependent displacement

1 of CLOCK:BMAL1 from DNA (Cao et al., 2021). CK1 $\delta$  also regulates PER turnover, removing this  
2 repressive complex. CRY1 remains bound with CLOCK:BMAL1 on DNA after the dissolution of this  
3 complex; upon CRY1 degradation, CLOCK:BMAL1 is then able to resume its transcriptional activity and  
4 the cycle restarts, with this whole process taking approximately 24 hours (Takahashi, 2017).

5 CHRONO (also referenced as human C1orf51 or GM129) has been proposed to be another  
6 component of the cellular timekeeping machinery. Previous work identified strong CLOCK:BMAL1  
7 binding within the CHRONO promoter, whilst high-throughput computational methods simultaneously  
8 identified CHRONO expression to be comparable to that of known 'clock genes' in a number of  
9 parameters (Annayev et al., 2014, Anafi et al., 2014, Goriki et al., 2014, Hatanaka et al., 2010).  
10 Furthermore, *chrono* mRNA showed robust circadian oscillations in abundance that are antiphasic to  
11 *bmal1* expression and in-phase with *per2* expression (Goriki et al., 2014, Annayev et al., 2014,  
12 Hatanaka et al., 2010). Mice with a homozygous deletion of the *chrono* gene exhibited a 25-minute  
13 increase in circadian period (Anafi et al., 2014), whilst *chrono* knockout in U2OS cells resulted in an  
14 approximately 2 hour increase in period (Yang et al., 2020), with CHRONO overexpression resulting in  
15 period shortening (Goriki et al., 2014). CHRONO also acts as a repressor of CLOCK:BMAL1 activity  
16 (Anafi et al., 2014, Annayev et al., 2014, Goriki et al., 2014). Taken together, CHRONO appears to be a  
17 contributing component in the negative arm of the transcription/translation feedback loop, perhaps  
18 modulating and refining the activity of the core clock components (Annayev et al., 2014). However, the  
19 molecular mechanisms of this modulation are currently unclear.

20 Here, we dissect the molecular details of the interaction between CHRONO and its other known  
21 core circadian interactors, BMAL1 and PER2, employing biochemical, biophysical, and cellular  
22 methods. We identify a minimal domain of CHRONO required for transcriptional repression via BMAL1,  
23 determine critical residues required for interaction of this domain with the BMAL1 transactivation  
24 domain (TAD) to carry out its repressive function, and show competition for this binding site with the  
25 BMAL1 regulators CRY1 and CBP. Additionally, we investigate the interaction between CHRONO and  
26 the circadian repressor PER2, showing that the C-terminal portion of CHRONO is sufficient to bind to

1 PER2 within the Casein Kinase 1 Binding Domain (CK1BD), where it appears to compete with CK1 $\delta$ .  
2 Together, this works sheds light on the activities by which CHRONO helps to fine-tune the mechanisms  
3 of cellular circadian timekeeping.

4

## 5 **Results**

### 6 ***Identification of a minimal repressive domain on CHRONO***

7 In humans, CHRONO is a 385 amino acid protein (**Fig. 1A**) that currently lacks clearly  
8 annotated functional domains. The full-length protein is capable of repressing CLOCK:BMAL1 activity  
9 at the *per1* promoter in a dose-dependent manner, comparable to the classical CLOCK:BMAL1  
10 repressor CRY1 (**Fig. 1B** (Anafi et al., 2014)). A previous study reported that truncations of CHRONO  
11 containing residues 1-284 or 108-385 were sufficient for CLOCK:BMAL1 repression, tentatively  
12 identifying a minimal core domain from residues 108-284 (Anafi et al., 2014). We utilized secondary  
13 structure predictions and conservation maps to further investigate these construct boundaries, noting  
14 that CHRONO remains highly conserved throughout mammals (**Supplementary Fig. 1A**). However,  
15 when other vertebrates, such as fish and birds, are added to the alignment, a conserved core begins to  
16 emerge (**Supplementary Fig. 1B**). We found no invertebrate orthologues of CHRONO. Secondary  
17 structure predictions found this conserved region to be predominantly structured with numerous alpha  
18 helices spanning the length of the construct (**Fig. 1A**). We termed this conserved core of CHRONO  
19 (residues 101-245), similar to one recently identified (Yang et al., 2020), the 'minimal repressive  
20 domain' (MRD).

21 Transient transfection of constructs expressing CHRONO full-length (FL) or the MRD, along  
22 with *per1*:LUC, BMAL1 and CLOCK into HEK 293T cells confirmed that the MRD was sufficient to  
23 reduce the transcriptional activity of CLOCK:BMAL1, as determined by relative *per1*:LUC expression  
24 (**Fig. 1C**). We note that the MRD does not repress to the same extent as full-length protein in these  
25 luciferase assays, likely attributable to differences in their relative expression levels (**Supplementary**  
26 **Fig. 2A**). As such, all further *in vitro* investigations of CHRONO's interaction with BMAL1 were

1 subsequently performed with the truncated CHRONO MRD construct. We purified the CHRONO MRD  
2 recombinantly and confirmed its folding by circular dichroism which, in line with our original structural  
3 predictions, indicated alpha helical secondary structure (**Fig. 1D**). This aligns with more recent  
4 Alphafold predictions, which confidently predicts residues 112-196 to form a helical bundle (**Fig.**  
5 **1E**)(Jumper et al., 2021).

6

### 7 ***CHRONO binds to the BMAL1 TAD***

8 The transactivation domain (TAD) of BMAL1, defined from residues 579-626, with a highly  
9 conserved core from residues 594-626 (**Fig. 2A, Supplementary Fig. 3A**), binds to both circadian  
10 coactivators (CBP/p300) and repressors (CRY1/CRY2) to generate circadian transcriptional oscillations  
11 (Xu et al., 2015). Initial studies reported that CHRONO interacts with a region upstream of the C-  
12 terminal TAD, distinct from the CRY1 binding site (Anafi et al., 2014). However, we observed that the  
13 purified BMAL1 TAD bound to nickel-bound HisGB1-CHRONO MRD (**Supplementary Fig. 3B**). The  
14 affinity of this interaction was then probed using isothermal titration calorimetry (ITC), revealing that the  
15 CHRONO MRD and the BMAL1 TAD interact with a  $K_d$  of approximately 387 nM (**Fig. 2B**).

16

### 17 ***CHRONO and CRY1/coactivator binding sites overlap***

18 To pinpoint the CHRONO MRD binding site on the BMAL1 TAD, we collected NMR  $^1\text{H}$ - $^{15}\text{N}$   
19 heteronuclear single quantum coherence (HSQC) spectra of  $^{15}\text{N}$ -labeled BMAL1 TAD alone or in the  
20 presence of stoichiometric CHRONO MRD (**Supplementary Fig. 3C**). We observed differential line  
21 broadening upon CHRONO MRD addition, along with a set of new peaks arising from the complex. The  
22 dramatic loss in peak intensity was localised throughout the highly conserved core encompassing the  
23 alpha helix to the extreme C-terminus of the BMAL1 TAD, including the 'switch region', named for  
24 *cis/trans* isomerization of the W624-P625 peptide bond (Gustafson et al., 2017) (**Supplementary Fig.**  
25 **3D,E**). To explore this in more detail, we collected  $^1\text{H}$ - $^{15}\text{N}$  spectra on this evolutionarily-conserved  
26 minimal TAD (mTAD, **Supplementary Fig. 3F**) in response to titrations of the CHRONO MRD, CRY1

1 CC helix, or CBP KIX domain (**Fig. 2C**). Chemical shift perturbations and/or broadening are seen at a  
2 similar set of mTAD residues with the MRD and the other canonical regulators of this region,  
3 demonstrating that they bind similar overlapping regions on the TAD (**Fig. 2C**). Due to the instability of  
4 the isolated MRD at high concentrations, we had to limit its concentration compared to the others.  
5 However, consistent with our NMR studies on the larger TAD (**Supplementary Fig. 3C,D,E**), a new set  
6 of peaks corresponding to the bound complex began to arise as the MRD and  $^{15}\text{N}$  mTAD approached  
7 the same concentration.

8 In line with our discovery that the CHRONO MRD binds the highly conserved core of the BMAL1  
9 TAD, fluorescence polarization binding assays using a TAMRA-labelled BMAL1 mTAD probe showed  
10 that it bound the CHRONO MRD with a comparable affinity to the longer TAD (**Fig. 2D**). This affinity is  
11 moderately higher than the TAD's affinity for the other regulators; for example, full-length CRY1 binds  
12 to the BMAL1 TAD with an affinity of  $\sim 1 \mu\text{M}$  (Czarna et al., 2013) with a similar affinity for the CRY2-  
13 TAD complex (Fribourgh et al., 2020), while the CBP KIX domain binds with an affinity of  $\sim 2 \mu\text{M}$  (Garg  
14 et al., 2019, Xu et al., 2015). As with CRY1 and CBP KIX, a construct of the BMAL1 TAD that truncates  
15 the switch region led to reduced affinity for the CHRONO MRD (**Fig. 2E**).

16 The interplay between binding sites for transcriptional co-regulators in this critical region of  
17 BMAL1 could lead to a competition-based mechanism, where CHRONO contends with other regulators  
18 for TAD binding at different times throughout the circadian cycle. To test this hypothesis, we performed  
19 fluorescence polarisation using the TAMRA-labelled BMAL1 mTAD, first making a stable complex with  
20 the CRY1 PHR domain, and then titrating in the CHRONO MRD to demonstrate that MRD is indeed  
21 capable of directly competing with CRY1 for binding at this region of BMAL1 with an  $\text{IC}_{50}$  of 375 nM  
22 (**Fig. 2F**). Competition for BMAL1 binding has also been previously predicted to occur between  
23 CHRONO and the co-activator CBP (Anafi et al., 2014, Yang et al., 2020). Due to similarities in the mP  
24 values for CHRONO MRD and CBP KIX complexes with the TAMRA-BMAL1 mTAD, we were not able  
25 to use fluorescence polarisation to investigate competition between CBP and CHRONO. Instead, we  
26 used a native polyacrylamide gel assay, showing that CHRONO MRD could displace the CBP KIX

1 domain from TAMRA-BMAL1 mTAD (**Fig. 2G, Supplementary Fig. 3G**). Given that CRY1 and CBP  
2 KIX also compete for TAD binding (Xu et al., 2015), this demonstrates a multi-way competition that  
3 highlights the BMAL1 TAD as a particular hotspot for dynamic regulation of CLOCK:BMAL1  
4 transcriptional activity.

5

### 6 ***Specificity of CHRONO for BMAL1 originates from sequence differences in the TAD***

7 BMAL2 is a paralog of BMAL1 that plays a role in mammalian photoperiodism (Wood et al.,  
8 2020) but is not capable of maintaining circadian rhythmicity outside of the suprachiasmatic nucleus  
9 (Shi et al., 2010, Xu et al., 2015). BMAL2 shares a high degree of sequence and functional  
10 conservation with BMAL1 in the structured N-terminal bHLH and PAS domains. However, their  
11 disordered C-termini functionally diverge, with the C-terminus of BMAL1 conferring the ability to  
12 generate transcriptional oscillations (Xu et al., 2015). The minimal TAD of BMAL1 exhibits modest  
13 sequence differences from BMAL2, primarily localized to the helical region (**Fig. 3A**). Previous work has  
14 shown that CHRONO did not bind, nor was it able to repress, the CLOCK:BMAL2 heterodimer (Anafi et  
15 al., 2014). To assess the impact of sequence variation in the BMAL2 TAD on CHRONO binding, we  
16 evaluated their interaction by ITC, which showed weak binding between the CHRONO MRD and  
17 BMAL2 TAD (**Fig. 3B**). Due to the relatively low heats evolved and the high error value, a dissociation  
18 constant could not be calculated.

19 We previously identified a mutant that disrupts binding of transcriptional coregulators to the  
20 BMAL1 TAD by introducing L606A and L607A into the TAD alpha helix, referred to as the BMAL1 TAD  
21 LL/AA mutant (Xu et al., 2015). This mutant has a dramatically decreased capacity to bind HisGB1-  
22 CHRONO MRD by pull-down on nickel resin (**Supplementary Fig. 3H**). We performed ITC to  
23 quantitatively assess the impact of these mutations on the affinity of CHRONO for the BMAL1 TAD  
24 LL/AA mutant. The resulting curve shows the mutations to completely abrogate binding under these  
25 conditions (**Fig. 3C**). As with the BMAL2 TAD, we could not determine a dissociation constant. Co-  
26 transfection of LL/AA mutant BMAL1 into HEK 293T cells with a per1:LUC plasmid confirmed a

1 comparable phenotype *in vivo*: whilst both full-length CHRONO and CHRONO MRD repressed  
2 CLOCK:BMAL1 activity (**Fig. 1C**), the BMAL1 LL/AA mutation eliminated repression by both CHRONO  
3 constructs (**Fig. 3D**), as it did for CRY1 (Xu et al., 2015). This confirms that loss of the IxxLL motif in the  
4 TAD  $\alpha$ -helix, commonly associated with binding of transcriptional coregulators (Dyson and Wright,  
5 2016, Heery et al., 1997), not only disrupts the binding of CHRONO and the BMAL1 TAD during *in vitro*  
6 biochemical assays, but also results in a loss of CLOCK:BMAL1 repression by CHRONO in cells.

7

### 8 ***Binding of CHRONO C-terminus regulates PER2 stability***

9 In addition to binding BMAL1, CHRONO also interacts with the circadian repressor PER2 (Anafi et al.,  
10 2014, Annayev et al., 2014, Goriki et al., 2014), although the impact of this on PER2 function or activity  
11 has not been investigated. Classically, the primary post-translational regulator of PER2 stability is  
12 Casein Kinase 1 (CK1), particularly the CK1 $\delta$  isoform (Meng et al., 2010). CK1 $\delta$  exerts this action on  
13 PER2 through stable binding to a dedicated CK1-binding domain (CK1BD) (Eide et al., 2005).  
14 Degradation assays using transient transfection of HEK 293T cells with a PER2::LUC reporter plasmid,  
15 along with constructs expressing full-length CHRONO, CK1 $\delta$  or a catalytically inactive CK1 $\delta$  K38A  
16 mutant showed CHRONO to reduce PER2 half-life after exposure to cycloheximide in a manner  
17 comparable to CK1 $\delta$  (**Fig. 4A,B, Supplementary Fig. 4A**). Flag pull-downs using recombinantly-  
18 expressed PER2-flag, CK1 $\delta$  and/or the CHRONO MRD showed that whilst CK1 $\delta$  bound, the MRD was  
19 insufficient to directly interact with PER2 (**Fig. 4C**). Unlike the full-length protein, the isolated N- or C-  
20 termini of CHRONO were expressed at very low levels in HEK 293T cells, but we found evidence that  
21 the C-terminus of CHRONO can bind PER2 (**Fig. 4D**). Combined with previous work suggesting that  
22 the nuclear localization signal required to traffic CHRONO to the nucleus is found within its N-terminus  
23 (Yang et al., 2020), we are now able to begin highlighting multiple functional regions within the  
24 CHRONO protein (**Fig. 4E**).

25



1 ***CHRONO binds within the CK1-Binding Domain of PER2***

2 Following the surprising observation that CHRONO influences the half-life of the repressor PER2 to an  
3 extent comparable to its canonical regulator, CK1 $\delta$ , we next sought to determine the region of PER2 to  
4 which CHRONO binds. Given CHRONO's CRY-like repression of BMAL1 through binding to the TAD,  
5 we first looked to see if CHRONO also bound PER2 within its CRY Binding Domain (CBD) (Yagita et  
6 al., 2002). Cellular expression of CHRONO with either full-length PER2 or PER2 truncated just before  
7 its C-terminal CRY Binding Domain (PER2 $\Delta$ CBD) suggests that, unlike CRY, the PER2 CBD is not  
8 essential for the interaction between CHRONO and PER2 (**Supplementary Fig. 4B**).

9  
10 We next made a series of structurally informed truncations in PER2 and looked to see which of these  
11 would influence its capacity to bind CHRONO. Truncation after the J $\alpha$ -helix that follows the PAS-B  
12 domain (PER2 1-473) abolished CHRONO binding to PER2, whilst truncation after the annotated CK1  
13 Binding Domain (CK1BD, PER2 1-763) did not (**Fig. 5A**). More targeted truncations either before the  
14 start of the CK1BD (PER2 1-569) or prior to the second conserved motif required for CK1 binding  
15 (CK1BD-B) (Eide et al., 2005, Narasimamurthy and Virshup, 2021) also eliminated binding, suggesting  
16 that some portion of PER2 from residues 720-763 is required for CHRONO binding to PER2 (**Fig.**  
17 **5B,C**). However, the modes of PER2 binding by CK1 and CHRONO must differ, as the PER2 L730G  
18 mutation, which abolishes CK1 binding to PER2 (An et al., 2022) has no apparent impact on CHRONO  
19 binding to PER2 (**Fig. 5D**). Despite this difference, given the spatial overlap between the identified CK1  
20 and CHRONO binding regions, we posited that these two proteins might influence the other's  
21 interaction with PER2. Transient transfection with constructs expressing PER2, CK1 $\delta$  and increasing  
22 quantities of CHRONO supported this hypothesis, with a reduction in total CK1 $\delta$  signal observed to co-  
23 IP with PER2 as CHRONO levels increased (**Fig. 5E,F**). This observation adds a new level of circadian  
24 regulation by CHRONO suggesting that, in addition to directly regulating transcriptional activity through  
25 binding to the BMAL1 transactivation domain, CHRONO likely also regulates circadian repression

1 indirectly, by influencing the relative stability of the repressor PERIOD2 through competition with its  
2 canonical regulator, CK1.

3

#### 4 **Discussion**

5 Our study builds on previous work that not only identified CHRONO, but established its role in  
6 the molecular circadian oscillator through extensive *in vivo* experiments (Anafi et al., Goriki et al., 2014,  
7 Annayev et al., 2014, Hatanaka et al., 2010). CHRONO appears to be part of the negative arm of the  
8 circadian TTFL, with its knockout or overexpression influencing circadian period in both animals and  
9 cells (Anafi et al., 2014, Goriki et al., 2014, Yang et al., 2020), with its central role attributed to its  
10 capacity to repress CLOCK:BMAL1 activity (Anafi et al., 2014, Yang et al., 2020, Annayev et al., 2014).  
11 Here we further extend our understanding of CHRONO, probing the molecular details of its interactions  
12 that allow it to repress CLOCK:BMAL1, as well as elucidating the nature of its previously unexplored  
13 interaction with PER2.

14

15 We demonstrate that CHRONO interacts with high affinity at the extreme C-terminus of BMAL1–  
16 –the TAD—identifying interactions within the very C-terminal switch region (Gustafson et al., 2017)  
17 (**Fig. 2E**) and the  $\alpha$ -helix, where conservative mutations abolish binding between the two proteins (**Fig.**  
18 **3**). Strikingly, we found that this specificity of CHRONO for the TAD of BMAL1 is not extended to the  
19 highly related paralog BMAL2. Although overexpression of BMAL2 can rescue circadian rhythms of  
20 behaviour in whole animals to some extent in the absence of BMAL1 (Shi et al., 2010), differences in  
21 the regulation of the BMAL1 and BMAL2 TADs shown here for CHRONO, and previously for CRY1 and  
22 CBP (Xu et al., 2015), may underlie the persistence of transcriptional rhythmicity at the cellular level  
23 that is observed only when BMAL1 is present.

24

1           The identification of the BMAL1 TAD as the major site of CHRONO binding to BMAL1, and the  
2 competition of CHRONO, CRY and CBP/p300 for this region (**Fig. 2**), adds to the complex role that this  
3 region plays in regulating transcription of circadian-controlled genes, with permutations of regulators all  
4 vying for the same stretch of amino acids. The BMAL1 TAD likely utilises its intrinsically disordered  
5 nature to appeal broadly to circadian regulators, allowing for interactions with both coactivators,  
6 CBP/p300, and repressors, CRY and CHRONO, throughout the circadian cycle (Gustafson and Partch,  
7 2015). Regions of a similarly highly dynamic and flexible nature can be found in transactivation  
8 domains of important systems other than circadian biology, including ERM/MED25, p53/TAZ2, and  
9 SSAP/ZMF1 (Landrieu et al., 2015, Zhang and Childs, 1998, Zhang et al., 1998, Wells et al., 2008).  
10 Thus, additional studies of this critical regulatory region will likely provide considerable insight into the  
11 dynamic interplay of binding and competition, not only at the BMAL1 TAD, but also a number of other  
12 fundamental biological systems of transcriptional control.

13  
14           The nature the interaction between CHRONO and the repressor PERIOD2 discovered here  
15 expands CHRONO's role in circadian repression to a multi-modal one, with CHRONO both directly and  
16 indirectly regulating the circadian repressive phase. Classically, CK1 is thought to be a primary  
17 regulator of the stability of PER2 (Crosby and Partch, 2020, Eide et al., 2005, Lowrey et al., 2000, Toh  
18 et al., 2001), with more recent work from our group and others providing insight into the intricate  
19 'phosphoswitch' mechanism by which this works (Philpott et al., 2020, Zhou et al., 2015, Philpott et al.,  
20 2022). Briefly, this model considers two CK1 target sites on PER2, a so-called 'FASP' region, a series  
21 of five serine residues, named for the discovery that mutation of the first of these sites (S662G) results  
22 in Familial Advanced Sleep Phase (FASP) syndrome, and a degron, located just after the PAS-B  
23 domain at S480 (S478 in mice). Phosphorylation at the FASP increases PER2 stability, whilst the same  
24 action at S480 results in recruitment of the E3-ubiquitin ligase  $\beta$ -TrCP and subsequent PER2  
25 degradation, with the balance of phosphorylation between these two regions influencing overall PER2  
26 stability (Zhou et al., 2015). Recent work revealed the mechanism of interplay between these two sites,

1 with the phosphorylated FASP region directly inhibiting kinase activity at the degron, thereby promoting  
2 PER stabilization (Philpott et al., 2022, Philpott et al., 2020). The discovery that CHRONO is able to  
3 compete with CK1 for binding to PER2 adds another layer to this model, whereby CHRONO might  
4 prevent CK1 from phosphorylating the stabilizing FASP region, whilst still allowing for phosphorylation  
5 of the degron *in trans*, thereby promoting PER2 degradation (**Fig. 6**). This action would align with  
6 previous work showing that CHRONO overexpression shortened circadian period (Goriki et al., 2014)  
7 with CHRONO knockout increasing period (Anafi et al., 2014, Yang et al., 2020). It is also possible that  
8 CHRONO's competition with CK1 might also influence the capacity of CK1 to phosphorylate CLOCK to  
9 drive dissociation from DNA within the early repressive complex, thereby regulating the dynamics of  
10 displacement-type repression that occurs during this circadian phase (Cao et al., 2021).

11

12 Overall, this work provides mechanistic insight into the role of CHRONO within the mammalian  
13 circadian oscillator, demonstrating its capacity to both directly and indirectly regulate transcriptional  
14 repression through both BMAL1 and PER2. This expands our understanding of CHRONO's role in  
15 cellular timekeeping and provides a basis for further work investigating the activity of CHRONO within  
16 repressive complexes.

## 1 **Materials and Methods**

### 2 ***Multiple sequence alignment and structure prediction***

3 Alignment of protein sequences was performed using COBALT (NCBI) using sequences from the NCBI  
4 protein database. Alignments were then visualized and annotated using Jalview2 (Waterhouse et al.,  
5 2009). Prediction of secondary structure was carried out using PSIPRED 4.0 and Alphafold.

### 7 ***Expression and purification of proteins***

8 Human His-CHRONO, HisGB1-CHRONO and HisNusA-CHRONO minimal repression domain (MRD)  
9 constructs (aa 101-245) were transformed into the *Escherichia coli* BL21 Rosetta (DE3) strain for  
10 recombinant protein expression. Large-scale growths of 1-6L were performed in Luria Broth and  
11 induced with 0.5 mM IPTG during logarithmic growth; proteins were expressed for ~16 hours at 18°C.  
12 Cells were resuspended in Buffer A (50 mM Sodium Phosphate pH 7.5, 300 mM NaCl, 10 mM BME, 20  
13 mM Imidazole) and lysed by cell disruption followed by sonication on ice. The extract was clarified by  
14 centrifugation at 4°C. The supernatant was filtered through a 0.45-micron membrane, run over a  
15 HisTrap affinity chromatography column on a fast performance liquid chromatography (FPLC)  
16 instrument, and eluted with a gradient from Buffer A to Buffer B (50 mM Sodium Phosphate pH 7.5, 300  
17 mM NaCl, 10 mM BME, 400 mM Imidazole). His-NusA-CHRONO MRD was then incubated overnight at  
18 4°C with His-TEV to cleave the solubility tag. The sample was subsequently exchanged back into  
19 Buffer A and passed over a Nickel-NTA column, eluting into high-salt buffer B (50 mM Sodium  
20 Phosphate pH 7.5, 750 mM NaCl, 10 mM BME, 250 mM Imidazole). For all proteins, fractions  
21 containing the protein were concentrated and run over a preparative Superdex 75 size exclusion  
22 column into CHRONO buffer C (50 mM Sodium Phosphate pH 7.5, 300 mM NaCl, 10 mM BME, 5%  
23 glycerol). Purification steps were verified by SDS-PAGE and Coomassie Blue staining to confirm bands  
24 at expected molecular weights and assess purity. Protein concentration was assessed by absorbance  
25 at 280 nm using a calculated extinction coefficient of 13075 M<sup>-1</sup> cm<sup>-1</sup> for the untagged-protein and  
26 24535 M<sup>-1</sup> cm<sup>-1</sup> for HisGB1-CHRONO MRD.

1 Full-length mouse His-PERIOD2-flag (pBP2HF, a kind gift from the Aziz Sancar) was expressed in Sf9  
2 cells. Cells were resuspended in lysis buffer (15 mM HEPES pH 8.0, 250 mM NaCl, 0.1% NP40, 1 mM  
3 Na<sub>3</sub>VO<sub>4</sub>, 5 mM NaF, 5% glycerol, EDTA-free protease inhibitors (Roche)) and lysed by sonication on  
4 ice. The supernatant was clarified by centrifugation and filtered through a 0.45 µm membrane. The  
5 supernatant was then passed over M2 anti-flag affinity gel (Millipore Sigma) under gravity flow, washed  
6 with PER2 buffer (1 x TBS pH 7.5, 1mM EDTA, 5% glycerol, EDTA-free protease inhibitors (Roche))  
7 and eluted with 3x flag peptide in PER2 buffer. 1mM TCEP was added to this eluate. The appropriate  
8 fractions were then concentrated and run over a Superose 6 Increase 10/300 GL size exclusion column  
9 (Cytiva) into PER2 buffer supplemented with 1 mM TCEP to avoid solubly aggregated protein.  
10 Purification steps were verified by SDS-PAGE and Coomassie Blue staining to confirm bands at  
11 expected molecular weights and assess purity. Protein concentration was assessed by absorbance at  
12 280 nm using a calculated extinction coefficient of 78730 M<sup>-1</sup> cm<sup>-1</sup>. We found that purified full-length  
13 PER2 was prone to forming soluble aggregates upon freeze/thaw or with extended incubation at 4°C,  
14 so all protein in this study was used immediately after purification.

15

16 Mouse BMAL1 TAD (residues 579–626), BMAL2 TAD (residues 540–579) and CBP KIX proteins were  
17 all expressed as described previously (Xu et al., 2015). The minimal TAD (mTAD) of BMAL1 was  
18 cloned from residues 594-626 and purified using the same protocol as the extended TAD.

19

20 Human HisGST-CK1δ kinase domain (residues 1-294) preps were grown in the *E. coli* BL21 Rosetta  
21 (DE3) strain as described above. Cells were lysed in 50 mM Tris pH 7.5, 300 mM NaCl, 1 mM TCEP,  
22 and 5% glycerol using a high-pressure extruder (Avestin) or sonicator on ice. HisGST-CK1δ ΔC fusion  
23 proteins were purified using Glutathione Sepharose 4B resin (GE Healthcare) using standard  
24 approaches and eluted from the resin using 50 mM Tris pH 7.5, 300 mM NaCl, 1 mM TCEP, 5%  
25 glycerol and 25 mM reduced glutathione. His-TEV protease was added to cleave the His-GST tag from  
26 CK1δ ΔC at 4°C overnight. Cleaved CK1δ ΔC was further purified away from His-GST and His-TEV

1 using Ni-NTA resin (Qiagen) and subsequent size exclusion chromatography on a HiLoad 16/600  
2 Superdex 75 prep grade column (GE Healthcare) in 50 mM Tris pH 7.5, 200 mM NaCl, 5 mM BME, 1  
3 mM EDTA, and 0.05% Tween 20. Protein concentration was assessed by absorbance at 280 nm using  
4 a calculated extinction coefficient of  $43320 \text{ M}^{-1} \text{ cm}^{-1}$ .

5  
6 Mouse CRY1 PHR domain (residues 1-491) was expressed in Sf9 suspension insect cells (Expression  
7 Systems) as previously described (Parico et al., 2020). Cells were centrifuged at  $4^\circ \text{C}$  at  $3,200 \times g$ ,  
8 resuspended in 50 mM Tris, pH 7.5, 300 mM NaCl, 5% (vol/vol) glycerol, and 5 mM BME and lysed in  
9 low concentrations of detergent (0.01% Triton X-100), EDTA-free protease inhibitor tablets (Roche),  
10 and 1 mM phenylmethylsulfonyl fluoride using a high-pressure extruder (Avestin) followed by brief  
11 sonication on ice. After clarifying lysate on a centrifuge at  $4^\circ \text{C}$  at  $140,500 \times g$  for 1 h, protein was  
12 captured using Ni-NTA affinity chromatography (Qiagen). Protein was further purified using ion  
13 exchange chromatography preceding size exclusion chromatography on a HiLoad 16/600 Superdex 75  
14 prep grade column (GE Healthcare) into CRY buffer (20 mM HEPES pH 7.5, 125 mM NaCl, 5%  
15 glycerol, and 2 mM TCEP). CRY1 PHR protein preps were frozen in small aliquots and subjected to  
16 only one freeze/thaw cycle.

17

### 18 ***Circular dichroism***

19 CD spectra were acquired on a J-1500 CD spectrometer (JASCO). Four independent spectra were  
20 acquired with quartz cells of  $200 \mu\text{m}$  pathlength on samples containing 1 mg/mL His-CHRONO in  
21 CHRONO buffer (10 mM Sodium Phosphate pH 7.5, 300 mM NaCl, 10 mM BME). Signal from buffer  
22 alone was subtracted from the protein spectra.

23

### 24 ***Nickel pull-down assays***

25 Nickel pull-down assays were performed by incubating  $20 \mu\text{L}$  Ni-NTA resin,  $400 \mu\text{L}$  Buffer A (50 mM  
26 Sodium Phosphate pH 7.5, 300 mM NaCl, 10 mM BME, 20 mM Imidazole) with  $2.5 \mu\text{M}$  HisGB1-

1 CHRONO MRD (bait) and 5  $\mu\text{M}$  of BMAL1 TAD proteins (prey). Samples were incubated overnight at 4  
2  $^{\circ}\text{C}$  with rotation. Resin was pelleted and washed three times, and the bound fraction was eluted with  
3 250 mM Imidazole in Buffer A. Samples were analyzed by SDS-PAGE and SYPRO Ruby stain.

#### 5 ***NMR spectroscopy***

6 NMR was conducted at 25 $^{\circ}\text{C}$  on a Bruker 800-MHz spectrometer equipped with  $^1\text{H}$ ,  $^{13}\text{C}$ ,  $^{15}\text{N}$  triple  
7 resonance, z-axis pulsed field gradient probe. Data were processed using NMRPipe and NMRDraw  
8 (Delaglio et al., 1995). Chemical shift assignments were previously made for the BMAL1 TAD using  
9 BMRB accession number 25280 (Xu et al., 2015) and manually adjusted for use on the shorter BMAL1  
10 mTAD.  $^{15}\text{N}$  HSQC titration of 100  $\mu\text{M}$   $^{15}\text{N}$  TAD was done by stepwise addition of His-CHRONO MRD in  
11 10 mM MES (pH 6.5), 50 mM NaCl, 10 mM BME. Samples were concentrated to 300  $\mu\text{L}$  final volume  
12 and adjusted to a final concentration of 10% (v/v)  $\text{D}_2\text{O}$ .  $^{15}\text{N}$  HSQC data were analyzed with NMRViewJ  
13 (Johnson, 2004) to extract normalized peak intensities to plot for differential broadening calculations.  
14 Differential peak broadening was calculated by dividing the intensity of peaks in a sample of  $^{15}\text{N}$  TAD  
15 containing stoichiometric His-CHRONO by peak intensities of the free  $^{15}\text{N}$  TAD.

#### 17 ***Isothermal titration calorimetry***

18 Proteins were extensively dialyzed at 4 $^{\circ}\text{C}$  in 10 mM Sodium Phosphate pH 7.5, 300 mM NaCl, 10 mM  
19 BME using 3 kDa molecular weight cutoff filter dialysis tubing (Spectrum Labs) for 20 hours prior to  
20 running ITC. ITC was performed on a MicroCal VP-ITC calorimeter (Malvern Analytical) at 25 $^{\circ}\text{C}$  with a  
21 stir speed of 155 rpm, reference power of 10  $\mu\text{Cal}/\text{sec}$  and 10  $\mu\text{L}$  injection sizes. Protein ratios for the  
22 cell and syringe for the ITC assays are as follows: 19.2  $\mu\text{M}$  His-CHRONO MRD titrated into 192  $\mu\text{M}$   
23 BMAL1 TAD, 26.7  $\mu\text{M}$  HisCHRONO titrated into 210  $\mu\text{M}$  BMAL2 TAD, and 22.4  $\mu\text{M}$  His-CHRONO MRD  
24 titrated into 200.8  $\mu\text{M}$  LL/AA TAD. Data shown are from one representative experiment of two  
25 independent ITC experiments were performed for each complex. All data were best fit by a one-site  
26 binding model using Origin software with resulting stoichiometry values close to 1.



## 1 ***Fluorescence anisotropy***

2 The BMAL1 mTAD WT and  $\Delta$ switch (594-F619Y) probes were purchased from Bio-Synthesis with a  
3 5,6-TAMRA fluorescent probe covalently attached to the N terminus. The C terminus of the  $\Delta$ switch  
4 peptide was amidated, while the WT probe was left as a free carboxyl group to mimic the native C-  
5 terminal group of the TAD at L626. Equilibrium binding assays were performed in 50 mM Bis-Tris  
6 Propane, pH 7.5, 100 mM NaCl, 0.05% Tween-20, and 2 mM TCEP at room temperature. 20 nM  
7 TAMRA-BMAL1 mTAD peptide was preincubated with buffer alone or increasing concentrations of  
8 BMAL TAD constructs for 15 min at room temperature before FP analysis. Binding was monitored by  
9 changes in fluorescence polarization with a Perkin Elmer EnVision 2103 Multilabel plate reader with  
10 excitation at 531 nm and emission at 595 nm. The equilibrium dissociation constant and extent of non-  
11 specific binding was calculated by fitting the dose-dependent change in millipolarization level ( $\Delta$ mp) to  
12 a one-site specific binding model in GraphPad Prism, with averaged  $\Delta$ mp values from duplicate assays.  
13 Data shown are from one representative experiment of three independent assays.

14

## 15 ***Endpoint luciferase assays***

16 For per1:LUC reporter assays investigating CHRONO repression, plasmids were transfected in  
17 duplicate into HEK293T cells in a 48-well plate using LT-1 transfection reagent (Mirus) with the  
18 indicated plasmids: 5 ng/uL Per1:luc, 100 ng each of CLOCK and BMAL1 WT or L606A/L607A , along  
19 with the indicated amount of CHRONO full-length (FL) or the Minimal Repressive Domain (MRD);  
20 empty pcDNA4 vector was used to normalize total plasmid to 800 ng/well. Cells were harvested 30  
21 hours after transfection using Passive Lysis Buffer (NEB) and luciferase activity determined with Bright-  
22 Glo luciferin reagent (Promega). Each assay was repeated three independent times.

23

## 24 ***PER2::LUC degradation assays***

25 To investigate the influence of CHRONO on PER2 stability, 200 ng of plasmid expressing the  
26 PERIOD2::LUCIFERASE fusion construct under the PGK promoter (pPGK-PER2::LUC, in house) were

1 transiently transfected into HEK293T cells in 35 mm dishes, along with 100ng of either SPORT6-  
2 hClorf15-S-tag (CHRONO, a gift from the John Hogenesch lab), pcDNA4B-CK1 $\delta$ , pcDNA4B-CK1 $\delta$   
3 K38A, or an empty vector control using PEI at a ratio of 4:1. After ~16 hours, cells were changed into  
4 MOPS-buffered Air Medium (Bicarbonate-free, DMEM, 5 mg/mL glucose, 0.35 mg/mL sodium  
5 bicarbonate, 0.02 M MOPS, 2  $\mu$ g/mL pen/strep, 1% Glutamax, 1 mM luciferin, pH 7.6, 325 mOsm)  
6 (Crosby et al., 2017) and moved to a Lumicycle $\text{\textcircled{R}}$  luminometer (Actimetrics) where bioluminescent  
7 activity was recorded at 6 min intervals. After a further 48 hours, 8  $\mu$ g/mL cycloheximide was added to  
8 each dish and returned to recording until the signal reached a baseline.

9

### 10 ***Native gels***

11 To demonstrate competition between CBP KIX and CHRONO MRD for the BMAL1 mTAD, native  
12 acrylamide gels were poured with 12% acrylamide mix, 0.5x TBE, 1% glycerol, 0.00075% ammonium  
13 persulfate and 0.00075% TEMED. Samples were run in 50 mM Tris-HCl, pH 8.0, 100 mM KCl, 1 mM  
14 EDTA, 50 ng/ml BSA. TAMRA-mTAD was used at a final concentration of 8 nM, CBP KIX at a final  
15 concentration of 105  $\mu$ M and CHRONO in a four-fold dilution series from 2.3  $\mu$ M to 9.0 nM. Gels were  
16 run at 8 mA and imaged on an Amersham Typhoon $\text{\textsuperscript{TM}}$  scanner (Cytiva).

17

### 18 ***Co-immunoprecipitation***

19 Plasmids were transfected into HEK293T cells in a 10 cm dishes using PEI 25kDa. Cells were  
20 harvested 72 hours later for coimmunoprecipitation with anti-flag M2 affinity gel (Millipore Sigma).  
21 Briefly, cells were scraped on ice using 1.5 mL ice-cold PBS and centrifuged for 5 mins at 100 x g at  
22 4 $^{\circ}$ C. The supernatant was removed, and the resulting pellet resuspended in 150  $\mu$ L 'lysis buffer' (20  
23 mM Tris pH 7.5, 150 mM NaCl, 1 mM TCEP, 0.1% NP-40 and EDTA-free protease inhibitors (Roche)  
24 and left to lyse on ice for 10 mins. The lysed cells were centrifuged for a further 30 mins at 14000 rpm  
25 at 4 $^{\circ}$ C. The resulting supernatant was added to 25  $\mu$ L pre-washed anti-Flag M2 affinity gel (Millipore

1 Sigma). Tubes were rotated end over end for 2 hrs at 4°C. The gel was subsequently washed three  
2 times with 400 µL lysis buffer. Proteins were eluted from resin by addition of 40 µL 2X SDS Laemmli  
3 buffer and heated to 65°C for 10 minutes.

4

### 5 ***Western blotting***

6 Samples were run on AnyKD™ Mini-PROTEAN TGX™ gels (BioRad) using the manufacturer's protocol  
7 with a Tris-Glycine SDS buffer system. Protein transfer to nitrocellulose for blotting was performed  
8 using the Trans-Blot Turbo Transfer system (BioRad), with a standard or high-molecular weight  
9 protocol as appropriate. Nitrocellulose was washed briefly, and then blocked for 30 mins at RT in 5%  
10 w/w non-fat dried milk (Marvel) in Tris buffered saline/0.05% Tween-20 (TBST). Membranes were then  
11 incubated, rocking, with 1:5000 conjugated antibody (anti-c-myc HRP (9E10, sc40) or anti-Oct-A HRP  
12 to detect flag (sc-166355) diluted in blocking buffer (5% milk, TBST) overnight at 4°C. The following day  
13 the membrane was washed for a further 3 x 10 mins in TBST before chemiluminescence detection  
14 using Immobilon reagent (Millipore), imaged using a ChemiDoc XRS+ imager (Bio-Rad). Quantification  
15 was performed using Image Lab Software 6.0 (Bio-Rad).

16

### 17 **Acknowledgements**

18 We thank the Hogenesch lab (Cincinnati Children's Hospital Medical Center, Cincinnati, OH) and the  
19 Sancar Lab (University of North Carolina, School of Medicine) for generously providing the mammalian  
20 expression vector SPORT6-hClorf15-S-tag for human CHRONO and the pBP2HF plasmid for full-  
21 length mouse PER2 expression respectively. This work was funded by NIH grant R01GM107069-03  
22 and GM1414849 to C.L.P.. G.C.G.P. was funded by a HHMI Gilliam fellowship and the UCSC Graduate  
23 Division. P.C. was funded by EMBO ALTF 57-2019.

24

25

## 1 **References**

2

- 3 AN, Y., YUAN, B., XIE, P., GU, Y., LIU, Z., WANG, T., LI, Z., XU, Y. & LIU, Y. 2022. Decoupling PER  
4 phosphorylation, stability and rhythmic expression from circadian clock function by abolishing PER-CK1  
5 interaction. *Nat Commun*, 13, 3991.
- 6 ANAFI, R. C., LEE, Y., SATO, T. K., VENKATARAMAN, A., RAMANATHAN, C., KAVAKLI, I. H., HUGHES, M. E.,  
7 BAGGS, J. E., GROWE, J., LIU, A. C., KIM, J. & HOGENESCH, J. B. Machine learning helps identify  
8 CHRONO as a circadian clock component. *PLoS Biol*, 12.
- 9 ANAFI, R. C., LEE, Y., SATO, T. K., VENKATARAMAN, A., RAMANATHAN, C., KAVAKLI, I. H., HUGHES, M. E.,  
10 BAGGS, J. E., GROWE, J., LIU, A. C., KIM, J. & HOGENESCH, J. B. 2014. Machine learning helps  
11 identify CHRONO as a circadian clock component. *PLoS Biol*, 12, e1001840.
- 12 ANNAYEV, Y., ADAR, S., CHIOU, Y. Y., LIEB, J. D., SANCAR, A. & YE, R. 2014. Gene model 129 (Gm129)  
13 encodes a novel transcriptional repressor that modulates circadian gene expression. *J Biol Chem*, 289,  
14 5013-24.
- 15 ARYAL, R. P., KWAK, P. B., TAMAYO, A. G., GEBERT, M., CHIU, P. L., WALZ, T. & WEITZ, C. J. 2017.  
16 Macromolecular Assemblies of the Mammalian Circadian Clock. *Mol Cell*, 67, 770-782 e6.
- 17 CAO, X., YANG, Y., SELBY, C. P., LIU, Z. & SANCAR, A. 2021. Molecular mechanism of the repressive phase of  
18 the mammalian circadian clock. *Proc Natl Acad Sci U S A*, 118.
- 19 CROSBY, P., HOYLE, N. P. & O'NEILL, J. S. 2017. Flexible Measurement of Bioluminescent Reporters Using an  
20 Automated Longitudinal Luciferase Imaging Gas- and Temperature-optimized Recorder (ALLIGATOR). *J*  
21 *Vis Exp*.
- 22 CROSBY, P. & PARTCH, C. L. 2020. New insights into non-transcriptional regulation of mammalian core clock  
23 proteins. *J Cell Sci*, 133.
- 24 CUESTA, M., BOUDREAU, P., DUBEAU-LARAMEE, G., CERMAKIAN, N. & BOIVIN, D. B. 2016. Simulated  
25 Night Shift Disrupts Circadian Rhythms of Immune Functions in Humans. *J Immunol*, 196, 2466-75.
- 26 CZARNA, A., BERNDT, A., SINGH, H. R., GRUDZIECKI, A., LADURNER, A. G., TIMINSZKY, G., KRAMER, A. &  
27 WOLF, E. 2013. Structures of *Drosophila* cryptochrome and mouse cryptochrome1 provide insight into  
28 circadian function. *Cell*, 153, 1394-405.

- 1 DELAGLIO, F., GRZESIEK, S., VUISTER, G. W., ZHU, G., PFEIFER, J. & BAX, A. 1995. NMRPipe: a  
2 multidimensional spectral processing system based on UNIX pipes. *J Biomol NMR*, 6, 277-93.
- 3 DYSON, H. J. & WRIGHT, P. E. 2016. Role of Intrinsic Protein Disorder in the Function and Interactions of the  
4 Transcriptional Coactivators CREB-binding Protein (CBP) and p300. *J Biol Chem*, 291, 6714-22.
- 5 EIDE, E. J., WOOLF, M. F., KANG, H., WOOLF, P., HURST, W., CAMACHO, F., VIELHABER, E. L., GIOVANNI,  
6 A. & VIRSHUP, D. M. 2005. Control of mammalian circadian rhythm by CKlepsilon-regulated  
7 proteasome-mediated PER2 degradation. *Mol Cell Biol*, 25, 2795-807.
- 8 FRIBOURGH, J. L., SRIVASTAVA, A., SANDATE, C. R., MICHAEL, A. K., HSU, P. L., RAKERS, C., NGUYEN, L.  
9 T., TORGRIMSON, M. R., PARICO, G. C. G., TRIPATHI, S., ZHENG, N., LANDER, G. C., HIROTA, T.,  
10 TAMA, F. & PARTCH, C. L. 2020. Dynamics at the serine loop underlie differential affinity of  
11 cryptochromes for CLOCK:BMAL1 to control circadian timing. *Elife*, 9.
- 12 GARG, A., ORRU, R., YE, W., DISTLER, U., CHOJNACKI, J. E., KOHN, M., TENZER, S., SONNICHSEN, C. &  
13 WOLF, E. 2019. Structural and mechanistic insights into the interaction of the circadian transcription  
14 factor BMAL1 with the KIX domain of the CREB-binding protein. *J Biol Chem*, 294, 16604-16619.
- 15 GORIKI, A., HATANAKA, F., MYUNG, J., KIM, J. K., YORITAKA, T., TANOUE, S., ABE, T., KIYONARI, H.,  
16 FUJIMOTO, K., KATO, Y., TODO, T., MATSUBARA, A., FORGER, D. & TAKUMI, T. 2014. A novel  
17 protein, CHRONO, functions as a core component of the mammalian circadian clock. *PLoS Biol*, 12,  
18 e1001839.
- 19 GUSTAFSON, C. L., PARSLEY, N. C., ASIMGIL, H., LEE, H. W., AHLBACH, C., MICHAEL, A. K., XU, H.,  
20 WILLIAMS, O. L., DAVIS, T. L., LIU, A. C. & PARTCH, C. L. 2017. A Slow Conformational Switch in the  
21 BMAL1 Transactivation Domain Modulates Circadian Rhythms. *Mol Cell*, 66, 447-457 e7.
- 22 GUSTAFSON, C. L. & PARTCH, C. L. 2015. Emerging models for the molecular basis of mammalian circadian  
23 timing. *Biochemistry*, 54, 134-49.
- 24 HASTINGS, M. H., REDDY, A. B. & MAYWOOD, E. S. 2003. A clockwork web: circadian timing in brain and  
25 periphery, in health and disease. *Nat Rev Neurosci*, 4, 649-61.
- 26 HATANAKA, F., MATSUBARA, C., MYUNG, J., YORITAKA, T., KAMIMURA, N., TSUTSUMI, S., KANAI, A.,  
27 SUZUKI, Y., SASSONE-CORSI, P., ABURATANI, H., SUGANO, S. & TAKUMI, T. 2010. Genome-wide

- 1 profiling of the core clock protein BMAL1 targets reveals a strict relationship with metabolism. *Mol Cell*  
2 *Biol*, 30, 5636-48.
- 3 HEERY, D. M., KALKHOVEN, E., HOARE, S. & PARKER, M. G. 1997. A signature motif in transcriptional co-  
4 activators mediates binding to nuclear receptors. *Nature*, 387, 733-6.
- 5 JOHNSON, B. A. 2004. Using NMRView to visualize and analyze the NMR spectra of macromolecules. *Methods*  
6 *Mol Biol*, 278, 313-52.
- 7 JUMPER, J., EVANS, R., PRITZEL, A., GREEN, T., FIGURNOV, M., RONNEBERGER, O.,  
8 TUNYASUVUNAKOOL, K., BATES, R., ZIDEK, A., POTAPENKO, A., BRIDGLAND, A., MEYER, C.,  
9 KOHL, S. A. A., BALLARD, A. J., COWIE, A., ROMERA-PAREDES, B., NIKOLOV, S., JAIN, R., ADLER,  
10 J., BACK, T., PETERSEN, S., REIMAN, D., CLANCY, E., ZIELINSKI, M., STEINEGGER, M.,  
11 PACHOLSKA, M., BERGHAMMER, T., BODENSTEIN, S., SILVER, D., VINYALS, O., SENIOR, A. W.,  
12 KAVUKCUOGLU, K., KOHLI, P. & HASSABIS, D. 2021. Highly accurate protein structure prediction with  
13 AlphaFold. *Nature*, 596, 583-589.
- 14 LANDRIEU, I., VERGER, A., BAERT, J.-L., RUCKTOOA, P., CANTRELLE, F.-X., DEWITTE, F., FERREIRA, E.,  
15 LENS, Z., VILLERET, V. & MONTÉ, D. 2015. Characterization of ERM transactivation domain binding to  
16 the ACID/PTOV domain of the Mediator subunit MED25. *Nucleic Acids Research*, 43, 7110-7121.
- 17 LI, S., WANG, Y., WANG, F., HU, L. F. & LIU, C. F. 2017. A New Perspective for Parkinson's Disease: Circadian  
18 Rhythm. *Neurosci Bull*, 33, 62-72.
- 19 LOWREY, P. L., SHIMOMURA, K., ANTOCH, M. P., YAMAZAKI, S., ZEMENIDES, P. D., RALPH, M. R.,  
20 MENAKER, M. & TAKAHASHI, J. S. 2000. Positional syntenic cloning and functional characterization of  
21 the mammalian circadian mutation tau. *Science*, 288, 483-92.
- 22 MENG, Q. J., MAYWOOD, E. S., BECHTOLD, D. A., LU, W. Q., LI, J., GIBBS, J. E., DUPRE, S. M., CHESHAM,  
23 J. E., RAJAMOCHAN, F., KNAFELS, J., SNEED, B., ZAWADZKE, L. E., OHREN, J. F., WALTON, K. M.,  
24 WAGER, T. T., HASTINGS, M. H. & LOUDON, A. S. 2010. Entrainment of disrupted circadian behavior  
25 through inhibition of casein kinase 1 (CK1) enzymes. *Proc Natl Acad Sci U S A*, 107, 15240-5.
- 26 NARASIMAMURTHY, R. & VIRSHUP, D. M. 2021. The phosphorylation switch that regulates ticking of the  
27 circadian clock. *Mol Cell*, 81, 1133-1146.

- 1 PARICO, G. C. G., PEREZ, I., FRIBOURGH, J. L., HERNANDEZ, B. N., LEE, H. W. & PARTCH, C. L. 2020. The  
2 human CRY1 tail controls circadian timing by regulating its association with CLOCK:BMAL1. *Proc Natl*  
3 *Acad Sci U S A*, 117, 27971-27979.
- 4 PHILPOTT, J. M., FREEBERG, A. M., PARK, J., LEE, K., RICCI, C. G., HUNT, S. R., NARASIMAMURTHY, R.,  
5 SEGAL, D. H., ROBLES, R., CAI, Y. D., TRIPATHI, S., MCCAMMON, J. A., VIRSHUP, D. M., CHIU, J.  
6 C., LEE, C. & PARTCH, C. L. 2022. PERIOD phosphorylation leads to feedback inhibition of CK1 activity  
7 to control circadian period *bioRxiv*.
- 8 PHILPOTT, J. M., NARASIMAMURTHY, R., RICCI, C. G., FREEBERG, A. M., HUNT, S. R., YEE, L. E.,  
9 PELOFSKY, R. S., TRIPATHI, S., VIRSHUP, D. M. & PARTCH, C. L. 2020. Casein kinase 1 dynamics  
10 underlie substrate selectivity and the PER2 circadian phosphoswitch. *Elife*, 9.
- 11 REDDY, A. B. & O'NEILL, J. S. 2010. Healthy clocks, healthy body, healthy mind. *Trends Cell Biol*, 20, 36-44.
- 12 SAEED, Y. & ABBOTT, S. M. 2017. Circadian Disruption Associated with Alzheimer's Disease. *Curr Neurol*  
13 *Neurosci Rep*, 17, 29.
- 14 SALGADO-DELGADO, R. C., SADERI, N., BASUALDO MDEL, C., GUERRERO-VARGAS, N. N., ESCOBAR, C.  
15 & BUIJS, R. M. 2013. Shift work or food intake during the rest phase promotes metabolic disruption and  
16 desynchrony of liver genes in male rats. *PLoS One*, 8, e60052.
- 17 SCHEER, F. A., HILTON, M. F., MANTZOROS, C. S. & SHEA, S. A. 2009. Adverse metabolic and cardiovascular  
18 consequences of circadian misalignment. *Proc Natl Acad Sci U S A*, 106, 4453-8.
- 19 SHI, S., HIDA, A., MCGUINNESS, O. P., WASSERMAN, D. H., YAMAZAKI, S. & JOHNSON, C. H. 2010.  
20 Circadian clock gene *Bmal1* is not essential; functional replacement with its paralog, *Bmal2*. *Curr Biol*, 20,  
21 316-21.
- 22 TAKAHASHI, J. S. 2017. Transcriptional architecture of the mammalian circadian clock. *Nat Rev Genet*, 18, 164-  
23 179.
- 24 TOH, K. L., JONES, C. R., HE, Y., EIDE, E. J., HINZ, W. A., VIRSHUP, D. M., PTACEK, L. J. & FU, Y. H. 2001.  
25 An hPer2 phosphorylation site mutation in familial advanced sleep phase syndrome. *Science*, 291, 1040-  
26 3.
- 27 WATERHOUSE, A. M., PROCTER, J. B., MARTIN, D. M., CLAMP, M. & BARTON, G. J. 2009. Jalview Version 2-  
28 -a multiple sequence alignment editor and analysis workbench. *Bioinformatics*, 25, 1189-91.

- 1 WELLS, M., TIDOW, H., RUTHERFORD, T. J., MARKWICK, P., JENSEN, M. R., MYLONAS, E., SVERGUN, D.  
2 I., BLACKLEDGE, M. & FERSHT, A. R. 2008. Structure of tumor suppressor p53 and its intrinsically  
3 disordered N-terminal transactivation domain. *Proc Natl Acad Sci U S A*, 105, 5762-7.
- 4 WOOD, S. H., HINDLE, M. M., MIZORO, Y., CHENG, Y., SAER, B. R. C., MIEDZINSKA, K., CHRISTIAN, H. C.,  
5 BEGLEY, N., MCNEILLY, J., MCNEILLY, A. S., MEDDLE, S. L., BURT, D. W. & LOUDON, A. S. I. 2020.  
6 Circadian clock mechanism driving mammalian photoperiodism. *bioRxiv*, 2020.05.19.102194.
- 7 XU, H., GUSTAFSON, C. L., SAMMONS, P. J., KHAN, S. K., PARSLEY, N. C., RAMANATHAN, C., LEE, H. W.,  
8 LIU, A. C. & PARTCH, C. L. 2015. Cryptochrome 1 regulates the circadian clock through dynamic  
9 interactions with the BMAL1 C terminus. *Nat Struct Mol Biol*, 22, 476-484.
- 10 YAGITA, K., TAMANINI, F., YASUDA, M., HOEIJMAKERS, J. H., VAN DER HORST, G. T. & OKAMURA, H.  
11 2002. Nucleocytoplasmic shuttling and mCRY-dependent inhibition of ubiquitylation of the mPER2 clock  
12 protein. *EMBO J*, 21, 1301-14.
- 13 YANG, Y., LI, N., QIU, J., GE, H. & QIN, X. 2020. Identification of the Repressive Domain of the Negative  
14 Circadian Clock Component CHRONO. *Int J Mol Sci*, 21.
- 15 ZHANG, D. & CHILDS, G. 1998. Human ZFM1 protein is a transcriptional repressor that interacts with the  
16 transcription activation domain of stage-specific activator protein. *J Biol Chem*, 273, 6868-77.
- 17 ZHANG, D., PALEY, A. J. & CHILDS, G. 1998. The transcriptional repressor ZFM1 interacts with and modulates  
18 the ability of EWS to activate transcription. *J Biol Chem*, 273, 18086-91.
- 19 ZHANG, R., LAHENS, N. F., BALLANCE, H. I., HUGHES, M. E. & HOGENESCH, J. B. 2014. A circadian gene  
20 expression atlas in mammals: implications for biology and medicine. *Proc Natl Acad Sci U S A*, 111,  
21 16219-24.
- 22 ZHOU, M., KIM, J. K., ENG, G. W., FORGER, D. B. & VIRSHUP, D. M. 2015. A Period2 Phosphoswitch  
23 Regulates and Temperature Compensates Circadian Period. *Mol Cell*, 60, 77-88.
- 24



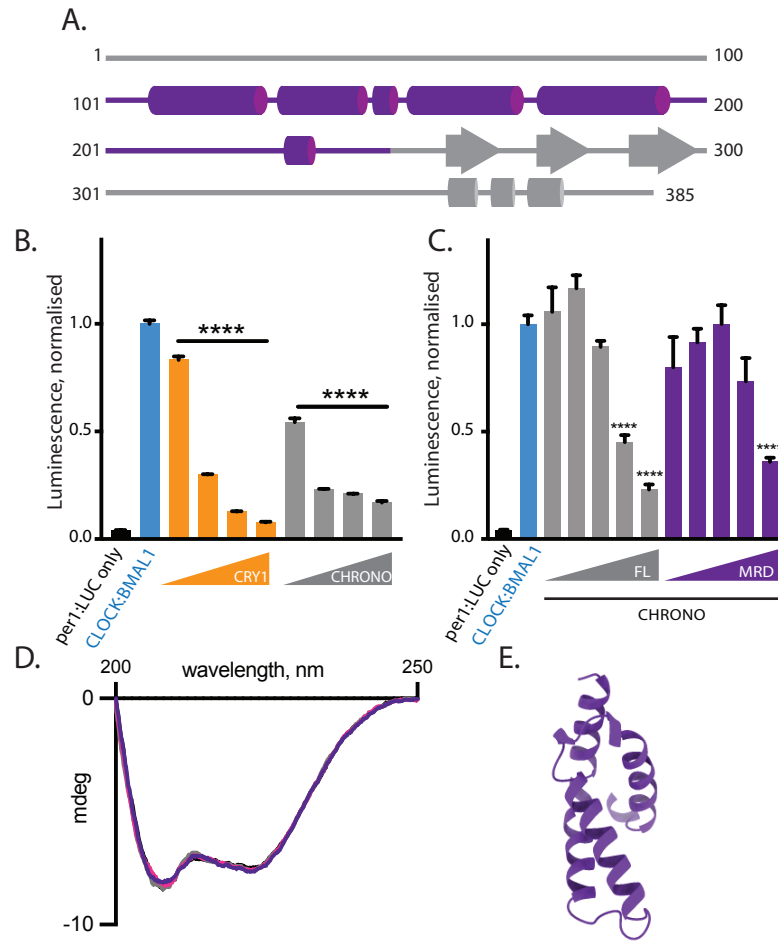

**Figure 1.** Identification of a minimal repressive domain (MRD) on CHRONO. (A) Schematic of CHRONO domain architecture with secondary structure prediction boundaries from PSIPRED analysis. Minimal repressive domain (MRD) is highlighted in purple. (B) per1:LUC reporter assay of CLOCK:BMAL1 activity in HEK 293T cells transiently transfected with per1:LUC, BMAL1, CLOCK, and increasing concentrations of CRY1 or CHRONO constructs. CRY1 and CHRONO plasmid concentrations range from 0.5-50ng. n=4, mean±SEM. One-way ANOVA with Dunnett's multiple comparisons test. (C) per1:LUC reporter assay of CLOCK:BMAL1 activity in HEK 293T cells transiently transfected with BMAL1, CLOCK, and increasing concentrations of CHRONO full-length (FL) or CHRONO MRD. Concentrations of CHRONO plasmids range from 0.25-25 ng. n=3, mean±SEM of duplicate measurements from one representative experiment. One-way ANOVA with Dunnett's multiple comparisons test. (D) Circular dichroism spectrum of CHRONO MRD is indicative of alpha helical secondary structure. 200  $\mu$ m cell, 4 replicate experiments overlaid. (E) AlphaFold prediction of CHRONO residues 112-196.

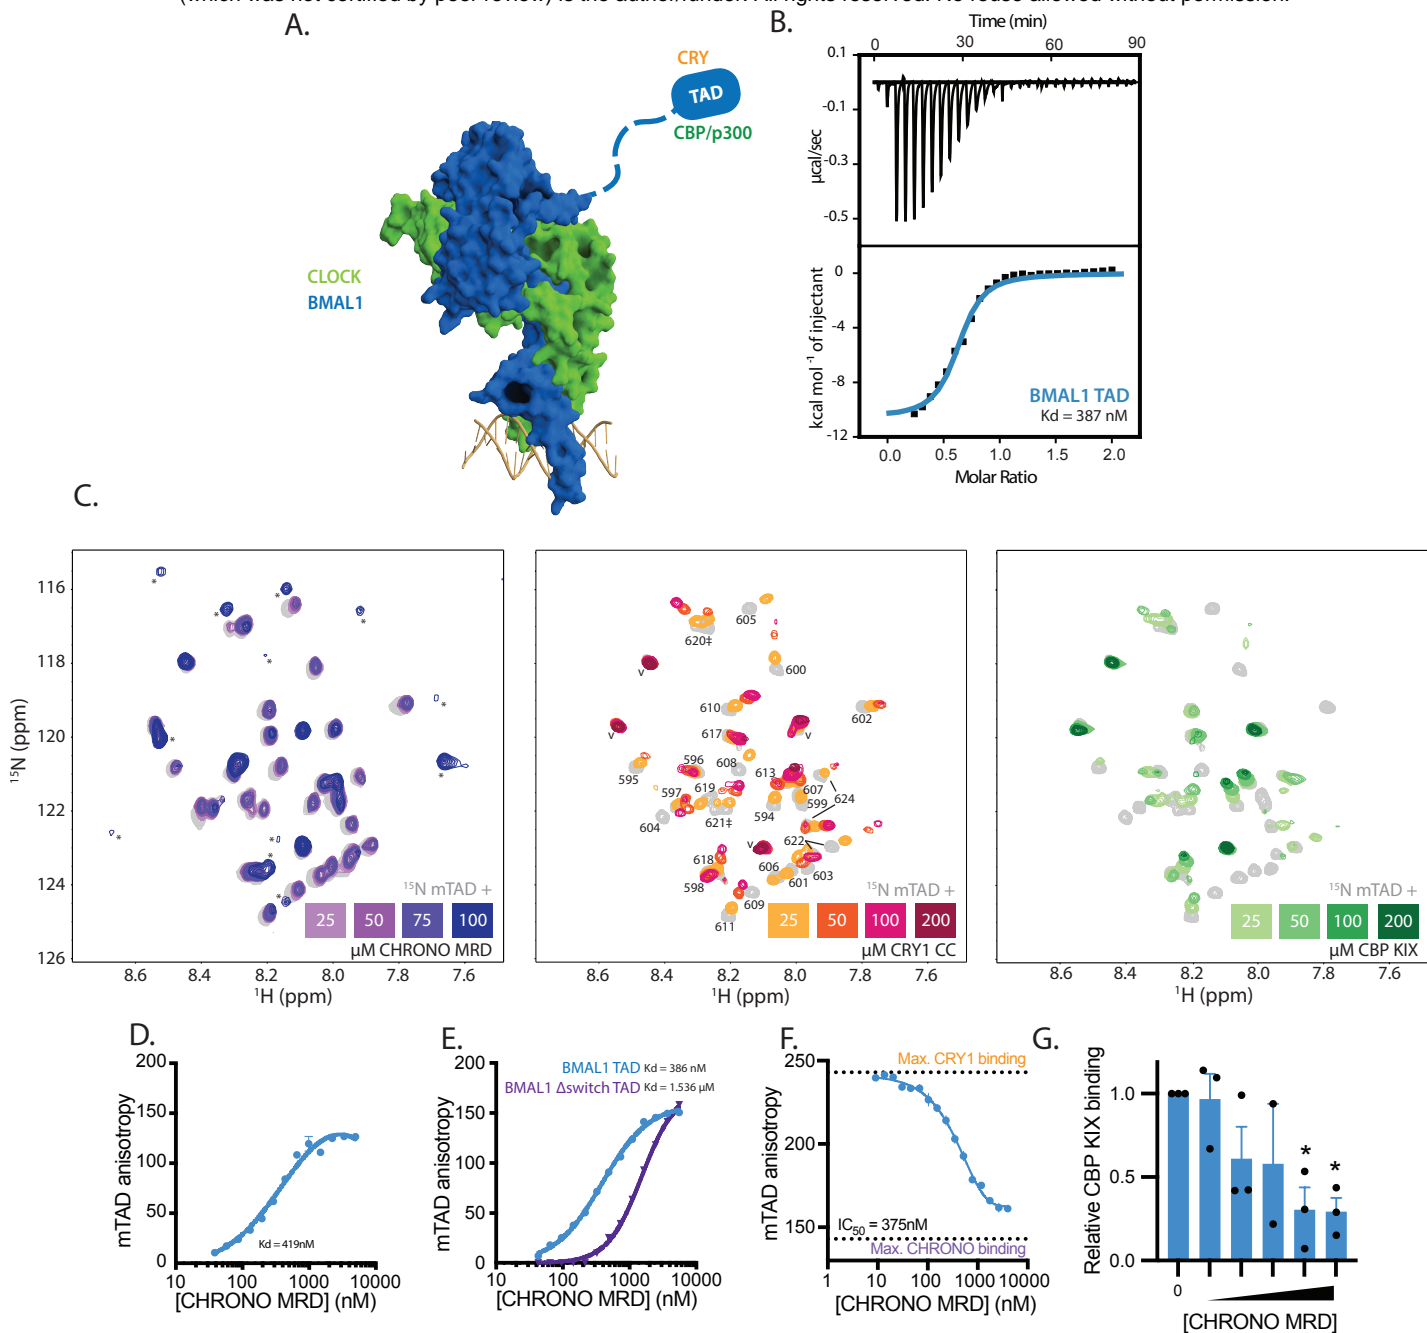

**Figure 2.** CHRONO binds to the BMAL1 TAD at sites that overlap with coactivator/CRY binding. (A) Model of CLOCK:BMAL1 bHLH PAS-AB bound to DNA, highlighting the BMAL1 TAD as a crucial site for regulation of BMAL1 activity. PDB 4F3L, 4H10. (B) ITC profile for the interaction of His-CHRONO MRD with BMAL1 TAD. Blue line, one-site binding model representing best fit to data. (C)  $^{15}\text{N}$  HSQC spectra showing  $^{15}\text{N}$ -BMAL1 TAD with titration of CHRONO MRD, CRY1 CC helix and CBP KIX domain. Residues as numbered. \* indicates new peaks that appear with addition of binding protein. v indicates vector residues retained after purification. Residues 620,621, 622 and 624 all show pairs of peaks due to *trans* and *cis* states, indicated by lines or † as appropriate. (D) Fluorescence polarisation of binding of untagged CHRONO MRD to BMAL1 mTAD construct. Duplicate measurements from a representative experiment shown.  $n=3$ . (E) Fluorescence polarisation with the CHRONO MRD and WT BMAL1 mTAD or BMAL1 mTAD lacking the switch region ( $\Delta$ switch).  $n=3$ , mean $\pm$ SEM. (F) CHRONO MRD competes with CRY1 PHR for binding at the BMAL1 mTAD with an  $\text{IC}_{50}$  of 375 nM by fluorescence polarisation. All points performed in duplicate, representative of 3 experiments shown. (G) Density analysis of native gel of TAMRA-BMAL1 mTAD pre-incubated with CBP KIX and increasing concentrations of CHRONO MRD (9.0 nM to 2.3  $\mu\text{M}$ ) shows competition for mTAD binding.  $n=3$ , one-way ANOVA, Dunnett's multiple comparisons test. Representative gel shown in Supplementary Fig. 3G.

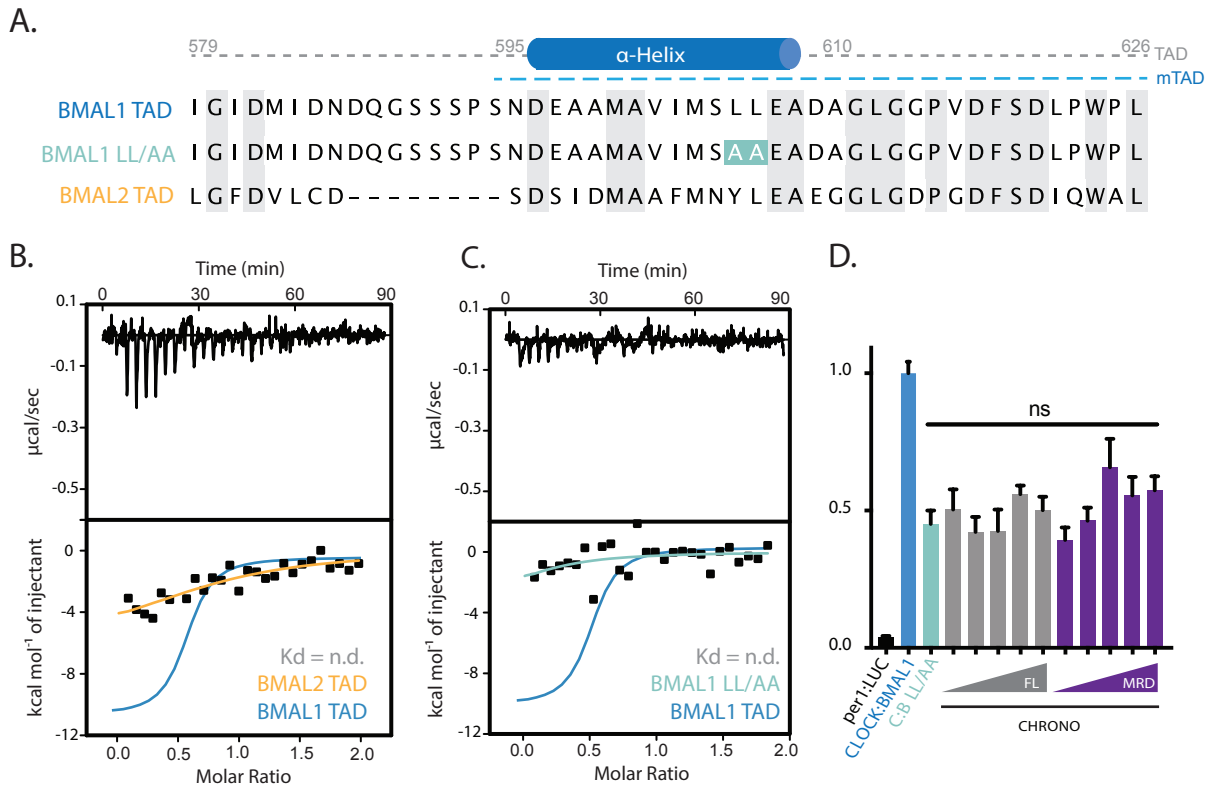

**Figure 3.** Specificity of CHRONO for BMAL1 originates from sequence differences in the TAD. (A) Alignment of the BMAL1 TAD to its homologous BMAL2 TAD sequence. (B-C) ITC profile of His-CHRONO with BMAL 2 TAD and BMAL1 LL/AA shows no substantial interaction. The BMAL 1 TAD ITC profile is mapped for comparison (blue). (D) per1:LUC reporter assay of CLOCK:BMAL1 activity in HEK 293T cells transiently transfected with per1:LUC, BMAL1 LL/AA, CLOCK, and increasing concentrations of CHRONO Full-length (FL) or CHRONO MRD constructs. CHRONO plasmid concentrations range from 0.25-25 ng/well. n=4, mean±SEM. One-way ANOVA with Dunnett's multiple comparisons test.

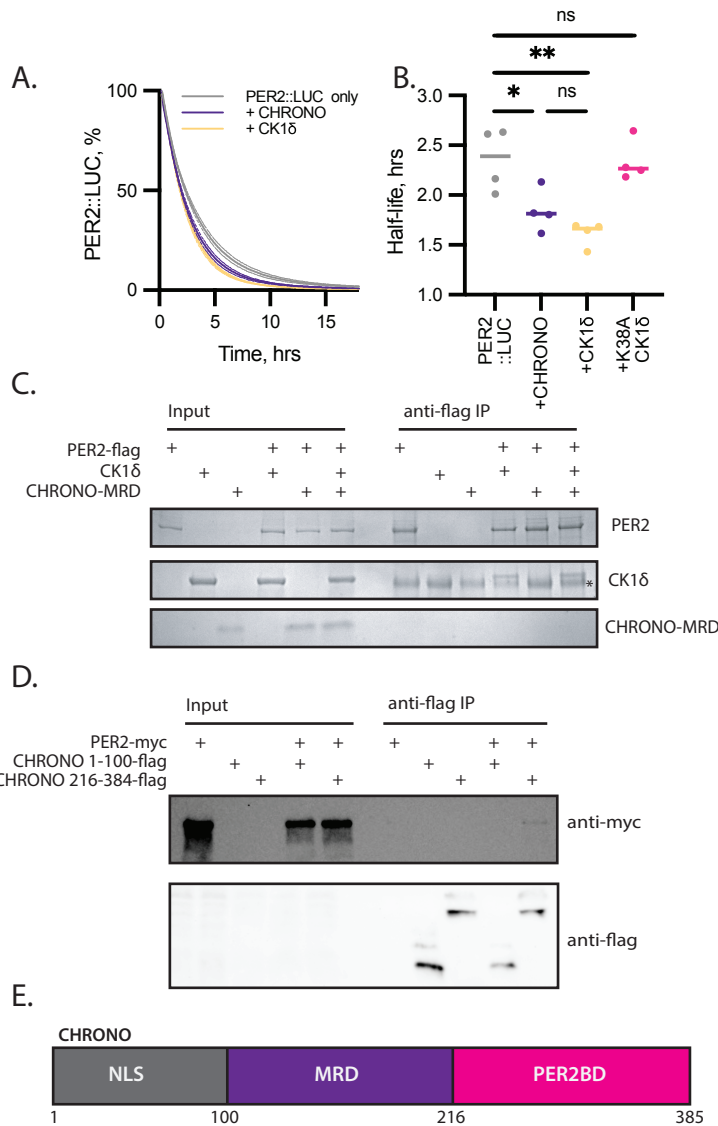

**Figure 4.** Binding of CHRONO C-terminus influences PER2 stability. (A) Degradation assay with transient expression of PER2::LUC in HEK 293T cells with CHRONO, CK1δ or catalytically inactive CK1δ K38A shows CHRONO to (B) reduce PER2 half-life in a manner comparable to CK1. n=4, mean±SEM, representative of 3 independent experiments. Extended Supplementary Fig. 4A. (C) Recombinantly expressed full-length PER2-flag pulls down with CK1δ but not the CHRONO MRD. n=2, representative shown. (D) Co-immunoprecipitation of PER2-myc with CHRONO 1-100-flag and CHRONO 216-384-flag shows PER2 to interact with the C-terminal region of CHRONO. n=3, representative shown. (E) Schematic overview of functional regions of CHRONO, highlighting a region containing a nuclear localisation signal (NLS), the minimal repressive domain (MRD) and the C-terminal PER2 Binding Domain (PER2BD).

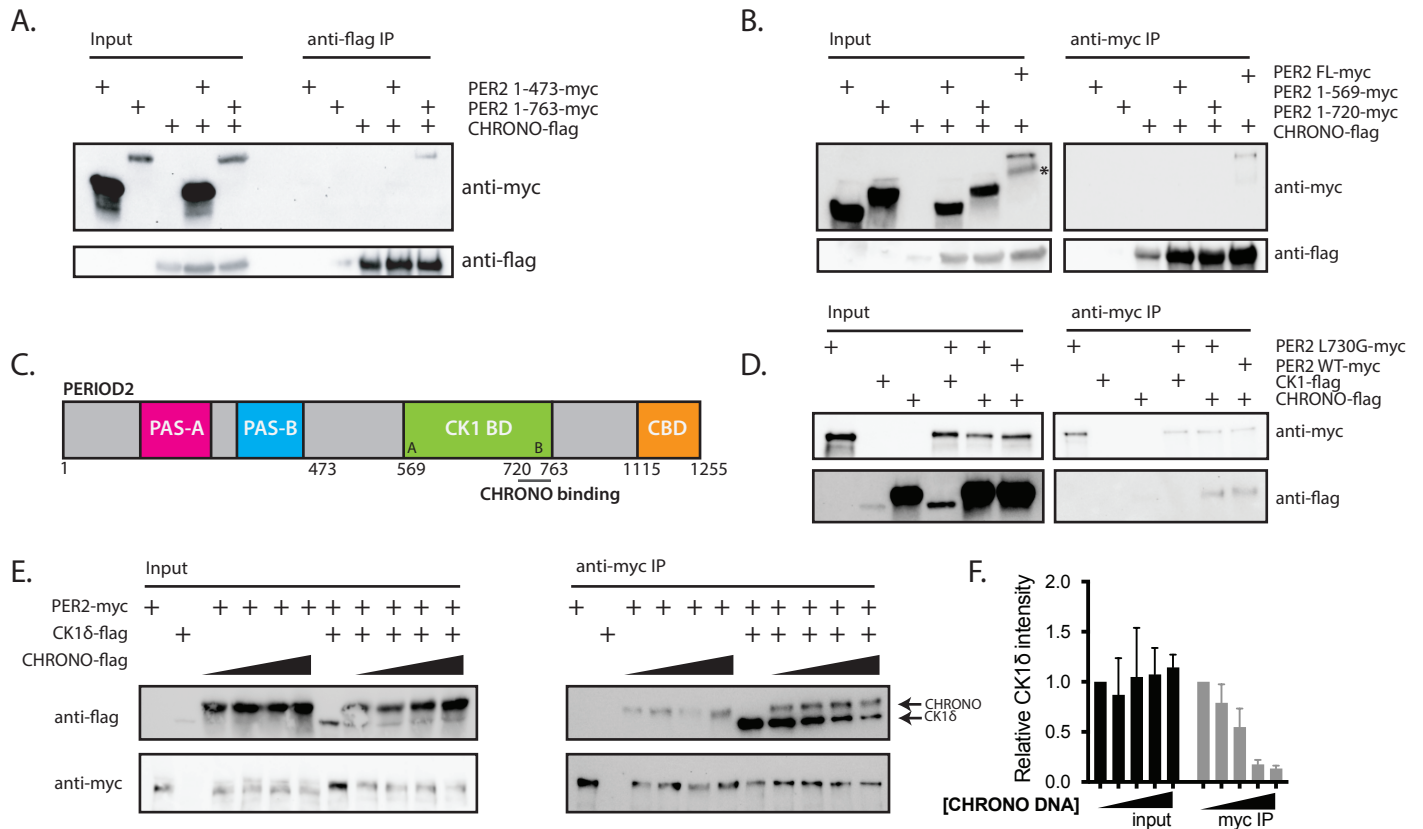

**Figure 5.** CHRONO binds PER2 within the CK1 binding domain (CK1BD). (A) Co-immunoprecipitation of CHRONO-flag with PER2 truncated after the PAS domains (1-473) or after the CK1BD (1-763). n=3, representative data shown. (B) Co-immunoprecipitation of CHRONO-flag with PER2 truncated before the CK1BD (1-569) or within the CK1BD (1-720). n=3, representative data shown. \* indicates non-specific band. (C) Schematic of the PER2 domain architecture, indicating the region required for CHRONO binding. 'A' and 'B' indicate the two CK1BD binding motifs. (D) Co-immunoprecipitation of CHRONO-flag or CK1δ-flag with PER2-myc WT or PER2 L730G-myc. n=3, representative data shown. (E) Co-immunoprecipitation of CK1δ-flag with PER2-myc in the presence of increasing amounts of CHRONO-flag. n=3, representative data shown. (F) Quantification of relative CK1δ intensity, normalised to PER2 intensity. n=3, mean±SEM.

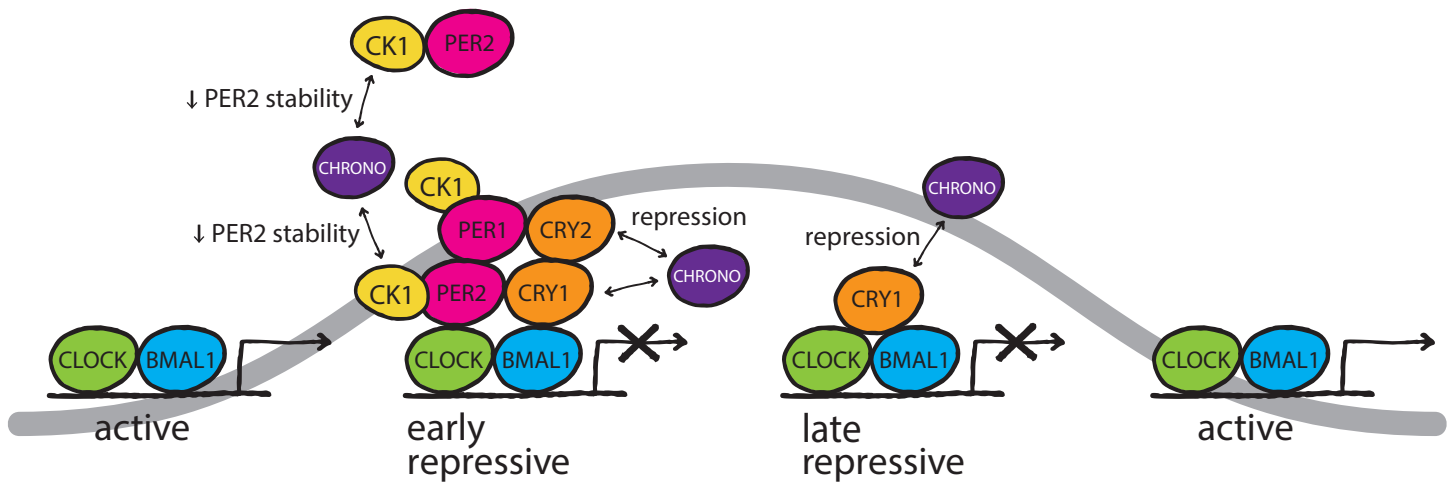

**Figure 6.** Diagram highlighting CHRONO's roles in the repressive phases of the mammalian TTFL, through competition with CK1 for binding to PER2, and with CRY1 for binding to the BMAL1 transactivation domain.
